# Supplementary material
Source: publisher figshare collection journal article supplement (https://frontiersin.figshare.com/ndownloader/files/16618319)
Supplement: Supplementary file [file 16618319]

Supplementary Figure S1

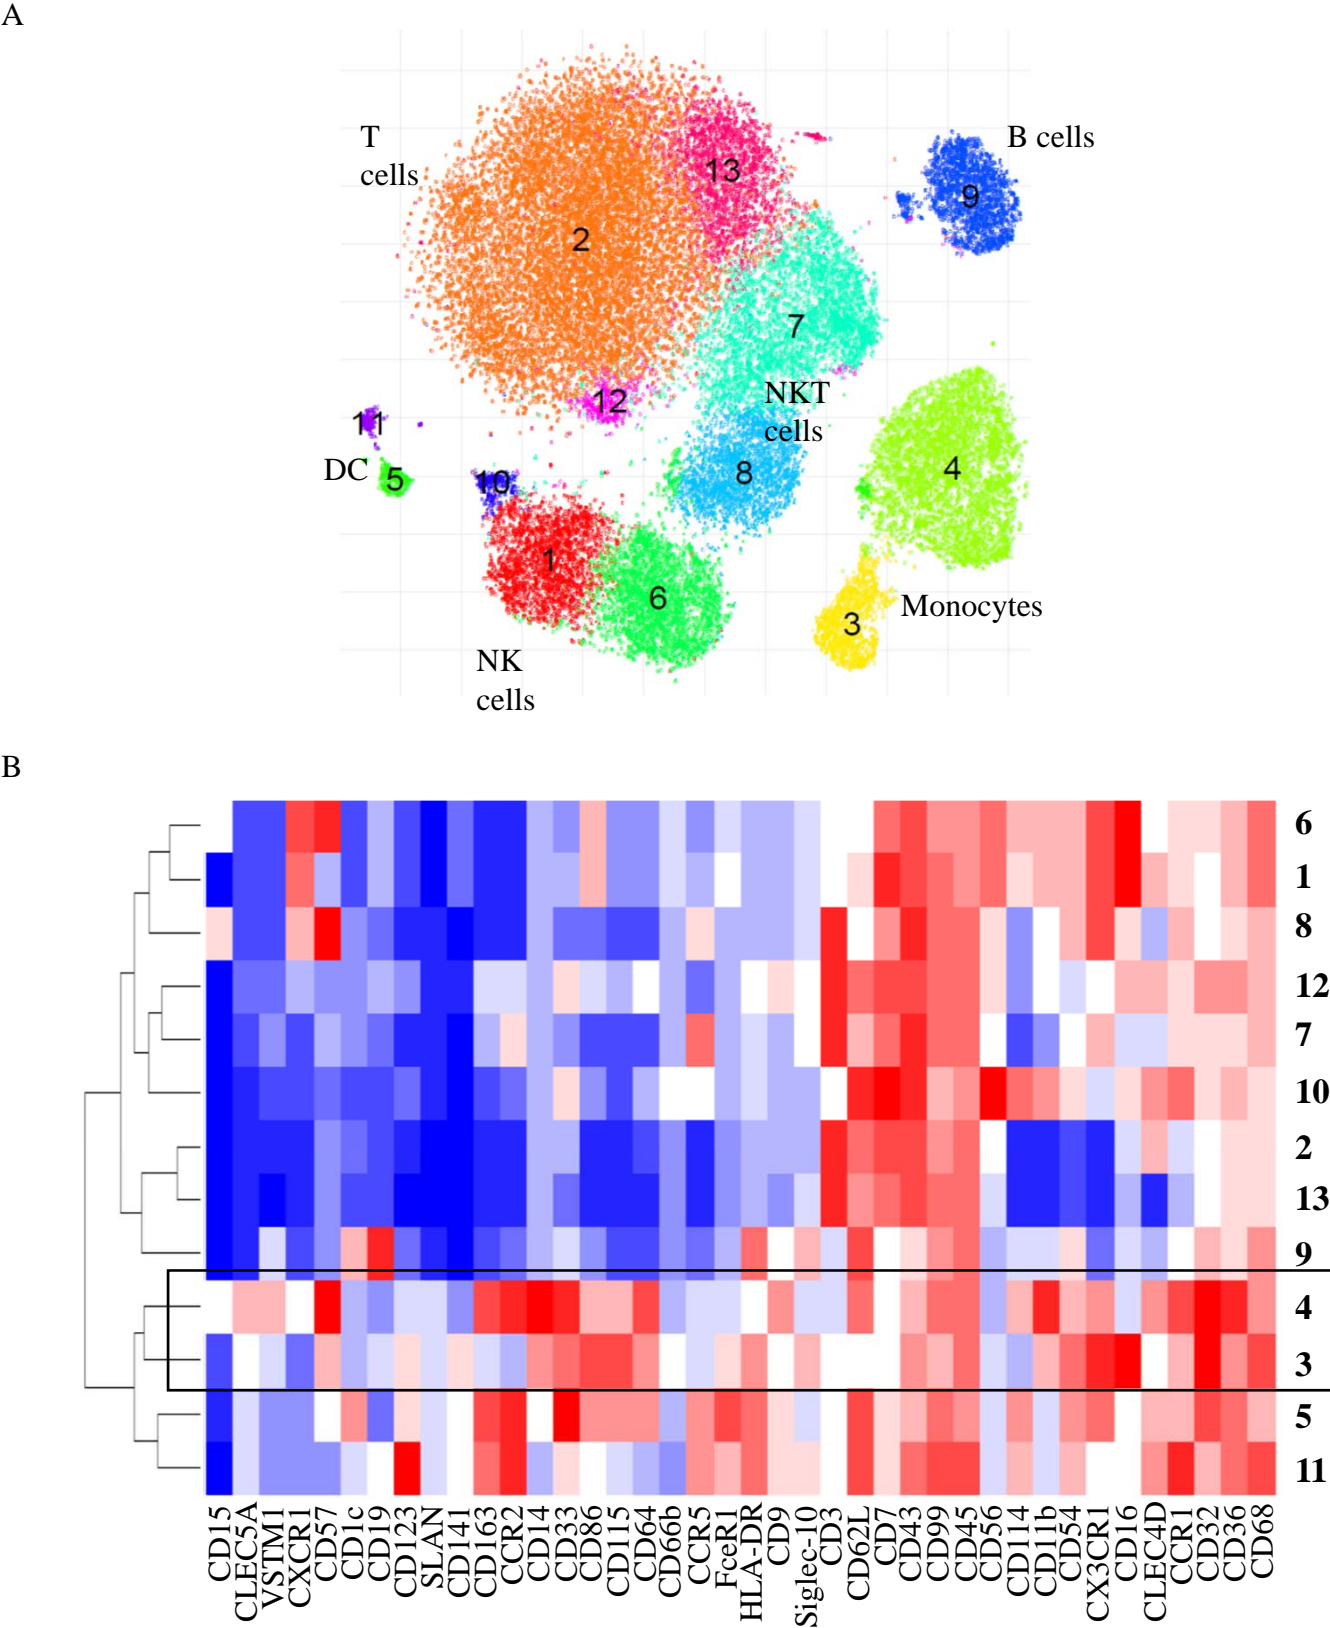

**Supp Figure S1. Visualization of the expression of forty markers on PBMCs. (A) *t*-SNE clustering of PBMCs based on the expression of the forty markers. (B) Expression level of the forty markers on each cluster in (A).**

Supplementary Figure S2

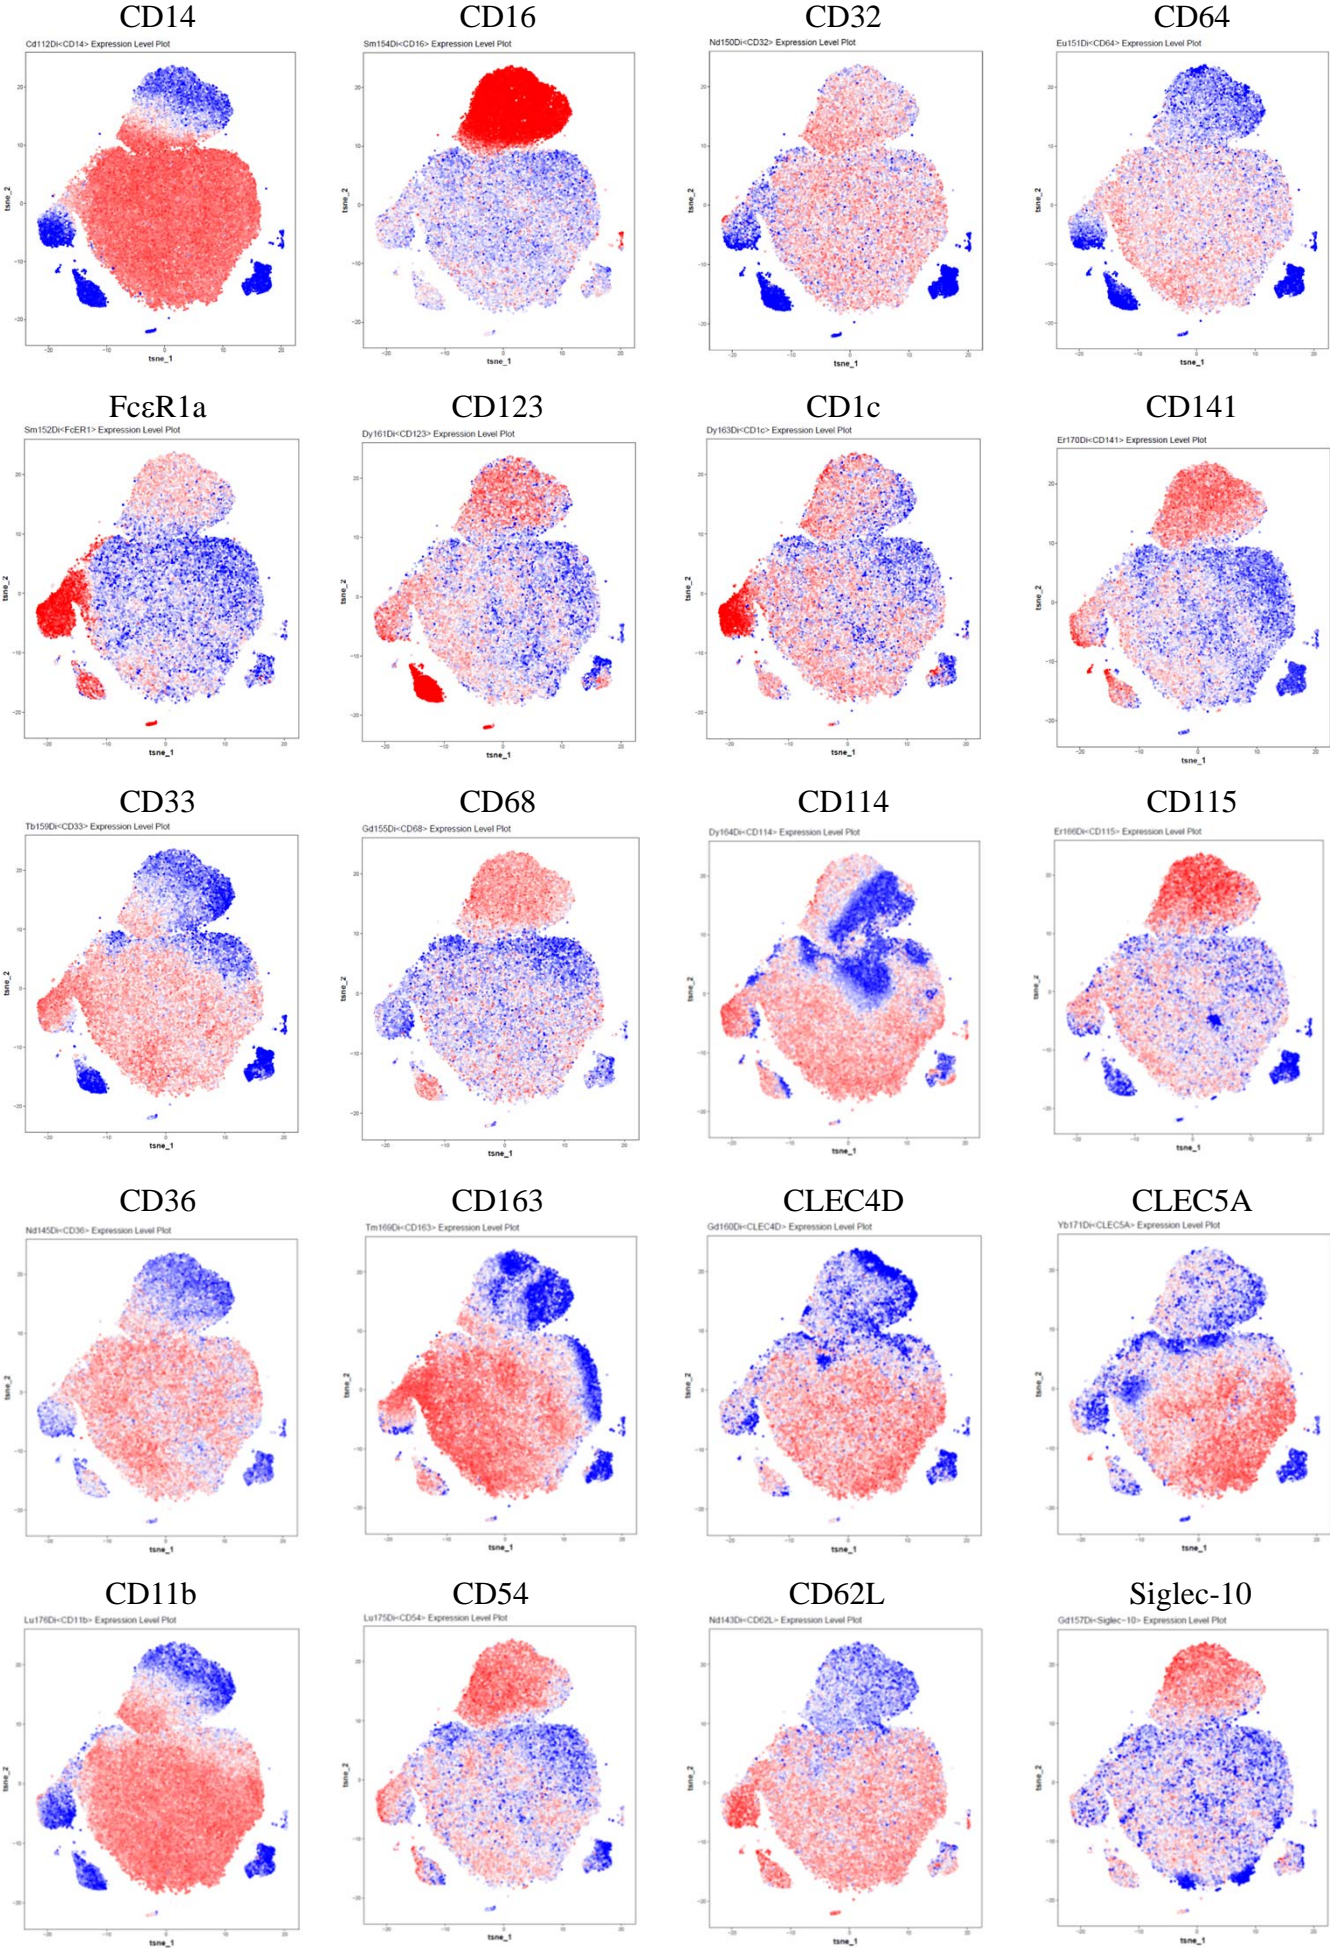



Supplementary Figure S2 (continued)

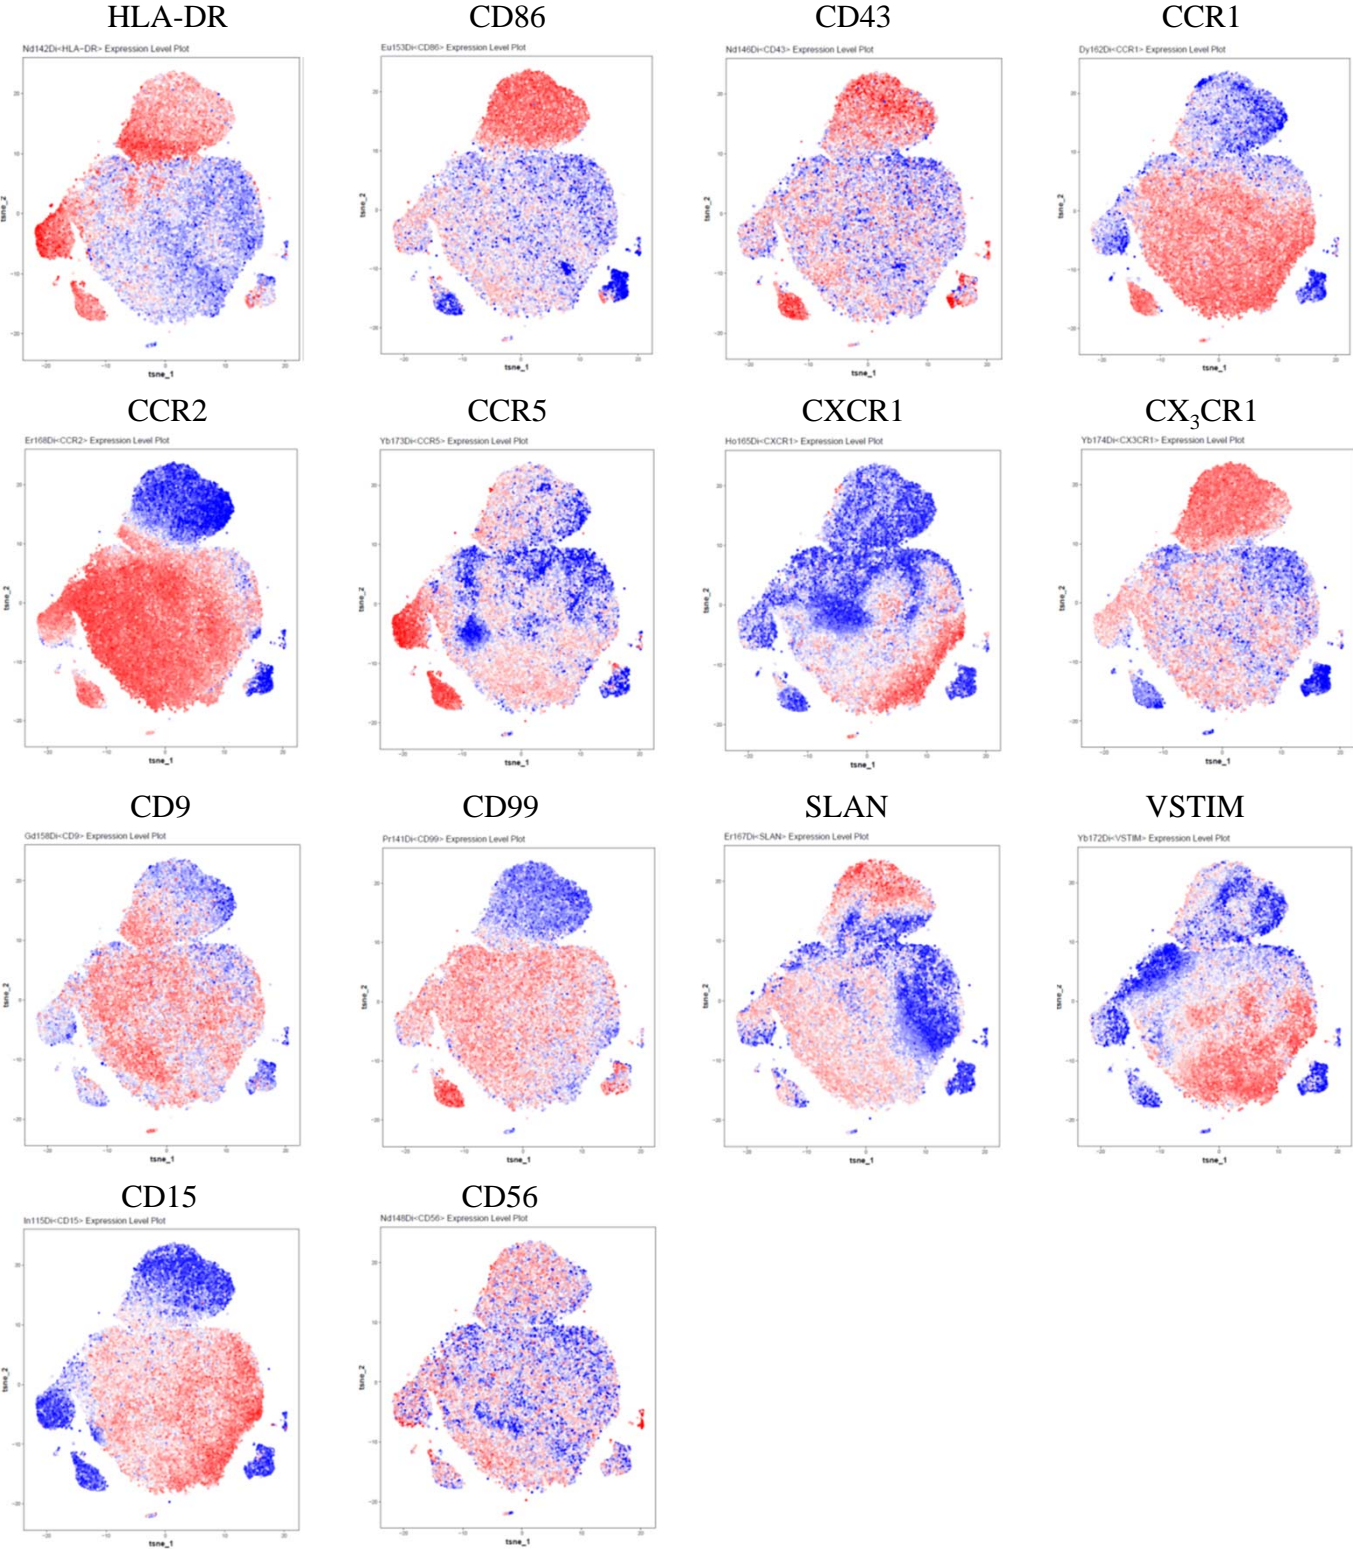

**Supp Figure S2.** Expression level of each of the thirty-four markers on monocytes visualized on *t*-SNE plots.

# Supplementary Figure S3

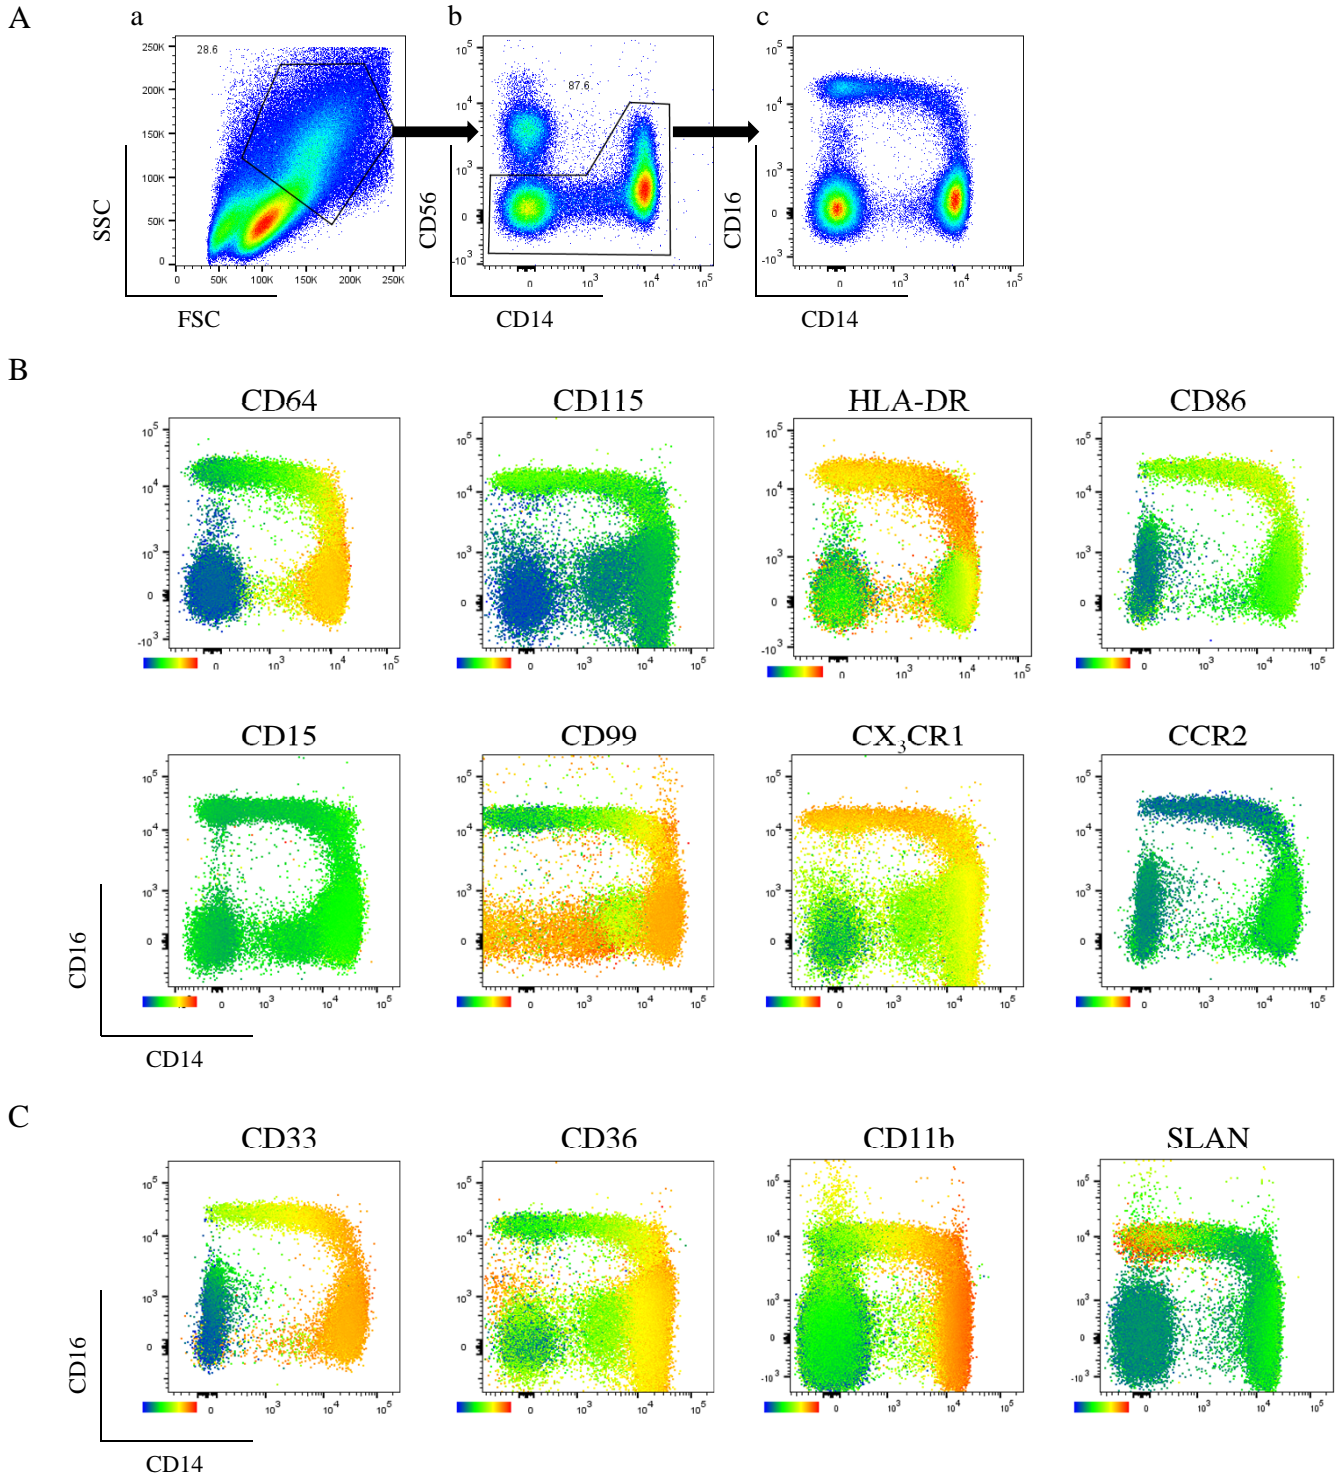

**Supp Figure S3. Markers shortlisted from CyTOF data were assessed with flow cytometry on a conventional CD16-CD14 plot. (A) Enriched monocytes were gated from PBMCs for (B) and (C). Heatmap expression of markers shortlisted to separate CD16<sup>+</sup> and CD16<sup>-</sup> monocytes (B) and NC and ITM subsets (C).**

Supplementary Figure S4

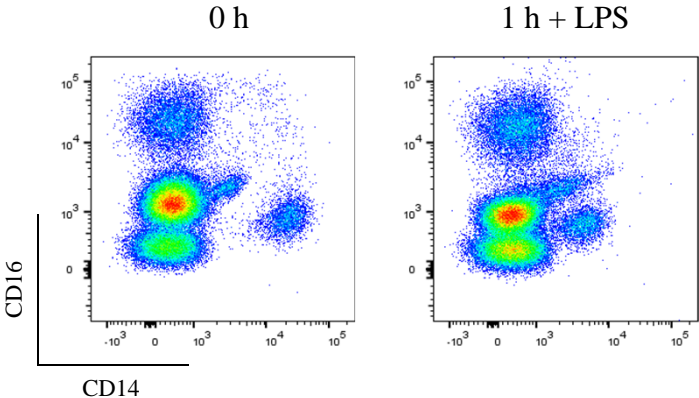

**Supp Figure S4.** Down-regulation of CD14 and CD16 on monocytes in whole blood after 1 h of stimulation with LPS.

Supplementary Figure S5

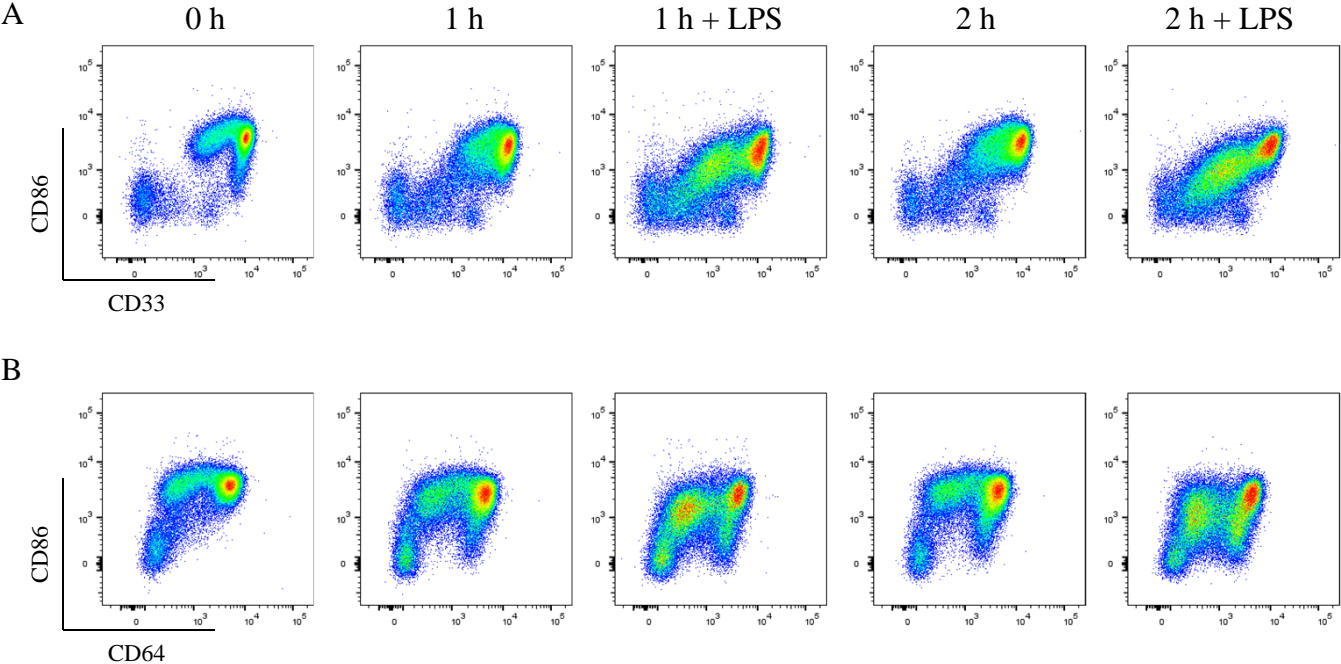

**Supp Figure S5.** Expression of CD33 on monocytes (A) is more modulated than that of CD64 (B) *in vitro*.
